# Supplementary material for: A Method to Find Longevity-Selected Positions in the Mammalian Proteome
Source: PLoS One. 2012 Jun 11;7(6):e38595. doi: 10.1371/journal.pone.0038595 (PMC3372525; doi:10.1371/journal.pone.0038595)
Supplement: Table S1 — The 107 protein domains that contain at least two longevity-selected positions. (XLS) [file pone.0038595.s002.xls]

## Sheet: Sheet1
protein	domain	OrthoMaM start	OrthoMaM end	OrthoMaM length	longevity-selected positions
AMHR2	Protein kinase	203	518	316	7
C3orf48	PP2C-like	171	525	355	4
KIF20B	Kinesin-motor	55	405	351	4
PRSS12	Peptidase S1	631	874	244	4
ALOX15	Lipoxygenase	115	662	548	3
BHMT2	Hcy-binding	11	305	295	3
BTD	CN hydrolase	48	354	307	3
EMID1	Collagen-like	181	370	190	3
IL31RA	Fibronectin type-III 3	234	326	93	3
LIPG	PLAT	347	482	136	3
MST1R	Sema	31	522	492	3
MTMR12	Myotubularin phosphatase	205	643	439	3
NLRP14	NACHT	177	499	323	3
NOV	VWFC	108	174	67	3
PARP14	Macro 3	1040	1211	172	3
PLXNA2	Sema	35	508	474	3
SATL1	N-acetyltransferase	259	379	121	3
SEMA4B	Sema	42	518	477	3
SHBG	Laminin G-like 2	224	390	167	3
STRADB	Protein kinase	58	369	312	3
TMEM56	TLC	44	246	203	3
TRIM26	B30.2/SPRY	295	539	245	3
ABCA6	ABC transporter 1	478	713	236	2
AFP	Albumin 1	19	210	192	2
AFP	Albumin 3	403	601	199	2
ANGPTL3	Fibrinogen C-terminal	237	455	219	2
ARHGEF16	PH	501	620	120	2
ARHGEF6	PH	443	548	106	2
ATM	FAT	1984	2566	583	2
ATR	FAT	1640	2185	546	2
BRCA1	BRCT 2	1756	1855	100	2
C1R	Peptidase S1	463	701	239	2
CD200	Ig-like V-type	28	138	111	2
CD83	Ig-like V-type	20	114	95	2
CD93	C-type lectin	32	174	143	2
CDCP1	CUB	523	541	19	2
CDON	Ig-like C2-type 5	405	516	112	2
CFD	Peptidase S1	26	253	228	2
CFTR	ABC transmembrane type-1 2	859	1155	297	2
CLCA1	VWFA	306	475	170	2
CP	F5/8 type A 1	20	357	338	2
CP	F5/8 type A 3	730	1061	332	2
CP	Plastocyanin-like 1	20	200	181	2
CR2	Sushi 11	719	775	57	2
CTPS2	Glutamine amidotransferase type-1	300	554	255	2
CUBN	CUB 1	474	586	113	2
CUBN	CUB 12	1738	1850	113	2
CUBN	CUB 17	2336	2448	113	2
CUBN	CUB 4	816	928	113	2
CUBN	EGF-like 4; calcium-binding (Potential)	305	348	44	2
DCHS1	Cadherin 13	1333	1436	104	2
EMB	Ig-like V-type 1	33	120	88	2
ERP27	Thioredoxin	39	152	114	2
F11	Apple 3	200	283	84	2
F8	F5/8 type A 3	1713	2040	328	2
FAT2	Cadherin 14	1556	1660	105	2
FAT2	Cadherin 15	1661	1758	98	2
FRAS1	VWFC 2	67	127	61	2
FREM1	C-type lectin	2061	2175	115	2
GALNT5	Ricin B-type lectin	804	935	132	2
GDPD1	GDPD	45	304	260	2
HEPHL1	Plastocyanin-like 3	376	558	183	2
IFNAR1	Fibronectin type-III 3	333	424	92	2
IL12RB1	Fibronectin type-III 2	143	236	94	2
IL1RL1	Ig-like C2-type 2	114	197	84	2
IL6ST	Ig-like C2-type	26	120	95	2
IQGAP1	Ras-GAP	985	1218	234	2
ISG20L2	Exonuclease	178	353	176	2
JAK1	FERM	34	420	387	2
KIF18B	Kinesin-motor	4	279	276	2
KIF22	Kinesin-motor	40	299	260	2
KIRREL2	Ig-like C2-type 2	123	222	100	2
KIRREL2	Ig-like C2-type 5	398	501	104	2
KIT	Ig-like C2-type 2	121	205	85	2
KLK6	Peptidase S1	22	242	221	2
LAMA2	Laminin IV type A 2	1176	1379	204	2
LAMA3	Laminin EGF-like 5	514	566	53	2
LETMD1	LETM1	144	359	216	2
LGTN	SUI1	491	564	74	2
LIFR	Fibronectin type-III 2	332	428	97	2
LRIT2	Fibronectin type-III	361	451	91	2
LTF	Transferrin-like 2	364	695	332	2
MAPK13	Protein kinase	25	308	284	2
MCF2	DH	572	752	181	2
MFI2	Transferrin-like 2	432	706	275	2
MTTP	Vitellogenin	28	659	632	2
MYO18A	Myosin head-like	420	1186	767	2
MYO5C	Myosin head-like	2	755	754	2
MYO7B	FERM 2	2037	2340	304	2
MYO7B	MyTH4 1	983	1186	204	2
NIN	EF-hand 4	219	252	34	2
NLRP12	NACHT	211	528	318	2
NTN5	NTR	345	475	131	2
OBSCN	Ig-like 43	1805	1873	69	2
ORC1L	BAH	45	171	127	2
PBK	Protein kinase	32	322	291	2
PDCD11	S1 motif 9	1036	1109	74	2
PDCD1LG2	Ig-like V-type	21	118	98	2
PGBD1	SCAN box	44	126	83	2
PKD1L1	REJ	377	1274	898	2
PLA2G4A	PLA2c	140	650	511	2
PRKDC	FAT	2882	3538	657	2
PRLR	Fibronectin type-III 2	127	227	101	2
PTPRC	Tyrosine-protein phosphatase 1	651	910	260	2
RASSF6	SARAH	281	328	48	2
RECQL4	Helicase C-terminal	683	850	168	2
RIPK1	Protein kinase	17	289	273	2
ROS1	Fibronectin type-III 3	558	668	111	2
ROS1	Fibronectin type-III 7	1558	1653	96	2
RPGRIP1	C2	801	890	90	2
RPS6KA6	Protein kinase 2	426	683	258	2
SHBG	Laminin G-like 1	45	217	173	2
SHROOM1	ASD2	543	825	283	2
SNX25	PXA	1	164	164	2
SNX25	RGS	287	401	115	2
SPINK5	Kazal-like 6	361	423	63	2
STK31	Protein kinase	534	842	309	2
SVEP1	Pentaxin	1365	1482	118	2
SVEP1	Sushi 16	2259	2316	58	2
SYPL1	MARVEL	10	219	210	2
TECTA	VWFD 2	712	929	218	2
TFPI2	BPTI/Kunitz inhibitor 2	96	149	54	2
TGFBRAP1	CNH	24	297	274	2
TRIM25	B30.2/SPRY	439	630	192	2
TYK2	FERM	26	431	406	2
USH2A	Fibronectin type-III 6	1954	2051	98	2
USH2A	Fibronectin type-III 7	2052	2138	87	2
USP48	DUSP 2	569	691	123	2
ZNF541	ELM2	1072	1164	93	2
