# Supplementary material for: A Method to Find Longevity-Selected Positions in the Mammalian Proteome
Source: PLoS One. 2012 Jun 11;7(6):e38595. doi: 10.1371/journal.pone.0038595 (PMC3372525; doi:10.1371/journal.pone.0038595)
Supplement: Table S2 — Longevity-selected positions of the protein domains shown in Table S1. (XLS) [file pone.0038595.s003.xls]

## Sheet: Sheet1
protein	domain	reference (human) character	reference OrthoMaM position	non-reference characters	bmls	pmls	bmass	pmass
AMHR2	Protein kinase	M	379	27	1.314	0.003969	-0.06588	0.4576
AMHR2	Protein kinase	T	447	27	3.619	0.002628	-0.4912	0.04471
AMHR2	Protein kinase	Y	465	27	8.562	0.001239	-1.144	0.03224
AMHR2	Protein kinase	T	469	27	2.089	0.006024	-0.1977	0.1973
AMHR2	Protein kinase	F	473	27	6.001	0.002296	-0.613	0.1182
AMHR2	Protein kinase	E	513	26	3.846	0.004612	-0.1675	0.528
AMHR2	Protein kinase	H	515	25	7.839	0.00598	-0.6239	0.2682
C3orf48	PP2C-like	P	224	23	5.466	0.008441	-0.195	0.6358
C3orf48	PP2C-like	E	405	22	4.542	0.004079	-1.08	0.002618
C3orf48	PP2C-like	E	411	20	3.023	0.005741	-0.6325	0.008567
C3orf48	PP2C-like	E	459	21	5.341	0.00761	-1.349	0.003743
KIF20B	Kinesin-motor	S	77	25	1.449	0.006423	-0.06449	0.5314
KIF20B	Kinesin-motor	Q	144	25	1.584	0.005499	-0.02481	0.831
KIF20B	Kinesin-motor	T	235	28	2.679	0.008603	-0.5411	0.01159
KIF20B	Kinesin-motor	A	259	26	2.526	0.005483	-0.2738	0.1423
PRSS12	Peptidase S1	G	641	26	3.391	0.00758	-0.6338	0.02294
PRSS12	Peptidase S1	Q	710	28	1.811	0.007569	-0.2615	0.06024
PRSS12	Peptidase S1	G	835	31	3.528	0.003143	-0.1367	0.5695
PRSS12	Peptidase S1	K	874	30	1.996	0.006461	-0.05265	0.7256
ALOX15	Lipoxygenase	P	120	15	8.725	0.0007393	-0.1435	0.7434
ALOX15	Lipoxygenase	R	205	15	8.369	0.0005025	-0.2762	0.5
ALOX15	Lipoxygenase	K	643	14	4.974	0.0001975	-0.5412	0.01588
BHMT2	Hcy-binding	M	61	28	3.206	0.001658	-0.1497	0.4496
BHMT2	Hcy-binding	N	69	28	2.179	0.00825	-0.3971	0.02213
BHMT2	Hcy-binding	D	89	28	6.713	0.001974	-1.16	0.01109
BTD	CN hydrolase	V	96	24	2.892	0.002075	-0.4498	0.026
BTD	CN hydrolase	I	221	24	5.816	0.006256	-0.9245	0.05456
BTD	CN hydrolase	S	350	25	5.297	0.0002769	-0.7603	0.01304
EMID1	Collagen-like	S	233	15	3.565	0.006273	-0.05695	0.8158
EMID1	Collagen-like	H	268	15	5.182	0.003068	-0.7793	0.02767
EMID1	Collagen-like	R	346	20	4.367	0.007807	-0.02767	0.9333
IL31RA	Fibronectin type-III 3	E	234	27	5.613	0.002255	-0.7564	0.03894
IL31RA	Fibronectin type-III 3	N	297	24	5.518	0.00843	-0.3794	0.349
IL31RA	Fibronectin type-III 3	L	300	24	6.658	0.006962	-1.205	0.01694
LIPG	PLAT	Q	421	26	2.772	0.001384	-0.2265	0.1732
LIPG	PLAT	N	445	26	5.923	0.00266	-0.2844	0.4521
LIPG	PLAT	N	469	27	3.519	0.001614	-0.2137	0.3181
MST1R	Sema	A	257	20	4.293	0.009009	-0.2377	0.4597
MST1R	Sema	S	268	20	6.377	0.002432	-1.116	0.01026
MST1R	Sema	G	393	19	7.253	0.0009803	-0.6367	0.1285
MTMR12	Myotubularin phosphatase	R	416	27	7.562	0.0008352	-1.374	0.004257
MTMR12	Myotubularin phosphatase	Q	509	27	6.167	0.0006663	-0.04593	0.8945
MTMR12	Myotubularin phosphatase	S	615	28	3.635	0.001929	-0.7107	0.005149
NLRP14	NACHT	Y	212	22	2.053	0.005538	-0.07527	0.5972
NLRP14	NACHT	L	370	23	6.078	0.0003985	-0.788	0.01547
NLRP14	NACHT	A	432	24	2.016	0.003278	-0.06628	0.604
NOV	VWFC	S	126	29	3.157	0.0008252	-0.111	0.5422
NOV	VWFC	K	128	29	1.941	0.002939	-0.06241	0.628
NOV	VWFC	E	162	30	4.687	0.003835	-0.4868	0.1391
PARP14	Macro 3	G	1182	25	6.84	0.0005895	-0.8586	0.02902
PARP14	Macro 3	D	1201	24	3.765	0.007152	-0.1727	0.5221
PARP14	Macro 3	V	1202	24	1.737	0.004833	-0.1014	0.391
PLXNA2	Sema	S	93	27	1.402	0.008232	-0.0425	0.696
PLXNA2	Sema	S	321	26	3.12	0.0004029	-0.4286	0.01411
PLXNA2	Sema	D	332	25	2.412	0.002385	-0.1287	0.4091
SATL1	N-acetyltransferase	E	271	17	3.264	0.0009845	-0.2862	0.1697
SATL1	N-acetyltransferase	Q	317	20	5.794	0.007157	-0.9605	0.02323
SATL1	N-acetyltransferase	A	353	21	3.902	0.003819	-0.2543	0.365
SEMA4B	Sema	R	363	23	4.489	0.004074	-0.7252	0.03384
SEMA4B	Sema	G	475	25	3.88	0.005538	-0.08441	0.7754
SEMA4B	Sema	I	486	25	1.392	0.003539	-0.1418	0.1647
SHBG	Laminin G-like 2	G	255	20	7.218	0.006812	-1.012	0.09897
SHBG	Laminin G-like 2	H	264	20	8.368	0.0004908	-1.982	0.0007226
SHBG	Laminin G-like 2	G	293	23	6.54	0.00088	-0.4028	0.2853
STRADB	Protein kinase	I	291	27	4.661	0.001005	-0.639	0.02532
STRADB	Protein kinase	S	320	27	1.823	0.007852	-0.04769	0.7275
STRADB	Protein kinase	S	335	27	1.235	0.004588	-0.05099	0.5543
TMEM56	TLC	I	107	24	1.298	0.003307	-0.0575	0.5117
TMEM56	TLC	Y	109	23	5.572	0.001865	-0.2635	0.4462
TMEM56	TLC	A	163	25	4.42	0.009772	-0.5655	0.1479
TRIM26	B30.2/SPRY	H	347	20	9.191	0.009467	-1.884	0.02536
TRIM26	B30.2/SPRY	D	415	19	2.669	0.009399	-0.247	0.3097
TRIM26	B30.2/SPRY	L	434	20	5.254	0.0007237	-0.5465	0.1078
ABCA6	ABC transporter 1	E	535	20	6.084	0.007986	-1.158	0.01911
ABCA6	ABC transporter 1	E	590	21	5.529	0.001682	-0.7733	0.02995
AFP	Albumin 1	F	50	28	5.06	0.003978	0.08594	0.8108
AFP	Albumin 1	E	119	28	4.386	0.0006985	-0.1994	0.4347
AFP	Albumin 3	Y	404	29	1.861	0.005393	-0.08995	0.5018
AFP	Albumin 3	T	460	28	4.327	0.009186	-0.6049	0.08187
ANGPTL3	Fibrinogen C-terminal	K	377	27	2.278	0.005526	-0.1092	0.498
ANGPTL3	Fibrinogen C-terminal	H	405	24	5.546	0.003205	-0.3326	0.3741
ARHGEF16	PH	T	586	20	6.134	0.003566	-1.232	0.009772
ARHGEF16	PH	H	617	20	9.438	0.00251	-1.241	0.06118
ARHGEF6	PH	M	457	24	1.653	0.005643	-0.08204	0.4864
ARHGEF6	PH	C	463	24	7.97	0.007658	-1.307	0.0361
ATM	FAT	C	2074	27	6.231	0.002323	-0.07786	0.8574
ATM	FAT	Q	2197	27	2.498	0.006542	-0.03905	0.8295
ATR	FAT	S	1876	27	5.654	0.007501	-0.6669	0.1356
ATR	FAT	Q	1877	27	2.067	0.004983	-0.04183	0.7814
BRCA1	BRCT 2	L	1800	26	4.846	0.005665	-0.8738	0.02382
BRCA1	BRCT 2	A	1843	26	1.593	0.004887	-0.01871	0.8715
C1R	Peptidase S1	S	553	22	3.59	0.005924	-0.1966	0.4666
C1R	Peptidase S1	R	669	23	5.659	0.0025	-0.2717	0.4781
CD200	Ig-like V-type	P	43	28	5.334	0.003494	-0.3493	0.3642
CD200	Ig-like V-type	G	114	29	5.09	0.005117	-0.6495	0.1018
CD83	Ig-like V-type	S	99	29	3.911	0.006639	-0.1411	0.617
CD83	Ig-like V-type	P	112	29	11.57	0.001381	-1.682	0.02016
CD93	C-type lectin	L	105	25	5.614	0.008161	-1.048	0.03185
CD93	C-type lectin	V	117	25	1.406	0.003929	-0.2831	0.01196
CDCP1	CUB	R	527	25	4.73	0.002932	-0.3908	0.28
CDCP1	CUB	G	529	27	8.741	0.004952	-2.327	0.002935
CDON	Ig-like C2-type 5	R	437	22	3.337	0.007663	-0.628	0.01981
CDON	Ig-like C2-type 5	Q	492	24	5.168	0.004062	-0.6616	0.06798
CFD	Peptidase S1	D	105	13	6.909	0.002625	-0.3796	0.4384
CFD	Peptidase S1	A	177	16	4.531	0.007458	-0.3756	0.3017
CFTR	ABC transmembrane type-1 2	L	884	26	2.859	0.001591	-0.4969	0.01411
CFTR	ABC transmembrane type-1 2	F	931	25	5.025	0.008359	-1.353	0.001487
CLCA1	VWFA	N	423	27	5.579	0.007663	-0.7968	0.0781
CLCA1	VWFA	G	473	29	2.7	0.009449	-0.4675	0.03194
CP	F5/8 type A 1	I	54	28	4.242	0.00272	-0.212	0.4369
CP	Plastocyanin-like 1	I	54	28	4.242	0.00272	-0.212	0.4369
CP	Plastocyanin-like 1	Q	165	28	4.419	0.006798	-0.546	0.1211
CP	F5/8 type A 1	Q	165	28	4.419	0.006798	-0.546	0.1211
CP	F5/8 type A 3	Q	811	29	3.488	0.002637	-0.2435	0.2951
CP	F5/8 type A 3	L	1026	25	2.086	0.006157	-0.4722	0.01235
CR2	Sushi 11	T	751	21	3.724	0.008683	-0.9027	0.006666
CR2	Sushi 11	H	753	21	8.193	0.007391	-1.871	0.008387
CTPS2	Glutamine amidotransferase type-1	N	443	27	4.912	0.00851	-0.03702	0.9237
CTPS2	Glutamine amidotransferase type-1	K	458	27	2.859	0.004347	-0.2439	0.2402
CUBN	EGF-like 4; calcium-binding (Potential)	P	321	26	11.49	0.0001241	-1.173	0.04334
CUBN	EGF-like 4; calcium-binding (Potential)	Y	340	25	1.24	0.005815	-0.0206	0.8266
CUBN	CUB 1	H	529	24	4.075	0.003582	-0.1175	0.6731
CUBN	CUB 1	E	556	23	4.487	0.002794	-0.2461	0.4156
CUBN	CUB 4	H	847	24	8.566	0.001883	-0.7215	0.207
CUBN	CUB 4	E	886	24	4.332	0.004789	-0.5789	0.06869
CUBN	CUB 12	R	1793	29	3.354	0.00397	0.08846	0.7178
CUBN	CUB 12	S	1839	28	3.082	0.001551	-0.331	0.1145
CUBN	CUB 17	L	2355	27	3.65	0.008249	-0.6595	0.02481
CUBN	CUB 17	S	2371	27	6.677	0.00213	-0.8513	0.05477
DCHS1	Cadherin 13	P	1357	23	10.15	0.0005047	-1.418	0.01364
DCHS1	Cadherin 13	G	1361	22	3.422	0.005734	-0.281	0.2434
EMB	Ig-like V-type 1	E	70	18	6.78	0.004167	-1.921	0.002219
EMB	Ig-like V-type 1	I	93	18	1.328	0.0005582	-0.303	0.001618
ERP27	Thioredoxin	A	71	29	3.124	0.009701	-0.08266	0.7315
ERP27	Thioredoxin	T	130	25	3.55	0.007556	0.008888	0.9744
F11	Apple 3	F	210	27	2.732	0.0044	-0.1562	0.4407
F11	Apple 3	S	213	27	6.745	0.006318	-0.9852	0.06873
F8	F5/8 type A 3	A	1741	22	5.112	0.003319	-0.4922	0.1761
F8	F5/8 type A 3	D	1956	27	6.372	0.001817	-1.099	0.009328
FAT2	Cadherin 14	H	1623	25	6.813	0.0005262	-0.09764	0.8051
FAT2	Cadherin 14	W	1640	25	17.95	0.0002729	-2.383	0.02193
FAT2	Cadherin 15	G	1701	26	2.859	0.002149	0.009982	0.9585
FRAS1	VWFC 2	E	81	26	3.058	0.008275	-0.5817	0.02302
FRAS1	VWFC 2	V	89	27	1.5	0.008504	-0.36	0.005522
FREM1	C-type lectin	A	2080	29	2.832	0.002472	-0.09614	0.6104
FREM1	C-type lectin	Q	2158	28	7.208	0.0008847	-0.7638	0.09615
GALNT5	Ricin B-type lectin	I	807	24	0.974	0.009595	0.01421	0.8569
GALNT5	Ricin B-type lectin	Y	929	28	7.631	0.009089	-1.867	0.004157
GDPD1	GDPD	N	145	25	3.064	0.009989	-0.1949	0.4548
GDPD1	GDPD	M	244	25	2.016	0.003267	-0.08936	0.5016
HEPHL1	Plastocyanin-like 3	R	443	26	3.938	0.009006	-0.3797	0.2254
HEPHL1	Plastocyanin-like 3	L	444	26	5.068	0.0003658	-0.3153	0.2516
IFNAR1	Fibronectin type-III 3	K	413	22	4.377	0.007213	-0.9756	0.01472
IFNAR1	Fibronectin type-III 3	S	417	22	3.963	0.002323	-0.9984	0.002183
IL12RB1	Fibronectin type-III 2	A	152	17	3.655	0.003928	-0.01233	0.9581
IL12RB1	Fibronectin type-III 2	T	161	17	2.214	0.002418	-0.02912	0.8267
IL1RL1	Ig-like C2-type 2	Y	132	24	6.785	0.004288	-0.3988	0.4146
IL1RL1	Ig-like C2-type 2	N	186	26	4.141	0.008801	-0.125	0.7081
IL6ST	Ig-like C2-type	Y	57	29	9.589	0.0009296	-1.706	0.00504
IL6ST	Ig-like C2-type	L	97	28	4.682	0.005785	-0.2763	0.441
IQGAP1	Ras-GAP	K	1008	31	1.187	0.003015	-0.05151	0.5169
IQGAP1	Ras-GAP	A	1104	28	2.576	0.003006	-0.3182	0.09075
ISG20L2	Exonuclease	Q	235	27	4.318	0.008342	-0.3899	0.2613
ISG20L2	Exonuclease	P	288	25	11.07	0.00816	-1.119	0.2273
JAK1	FERM	D	145	25	2.144	0.001703	-0.04597	0.7505
JAK1	FERM	N	309	28	6.686	0.009584	-0.7086	0.2102
KIF18B	Kinesin-motor	V	37	25	0.6093	0.009632	-0.02807	0.5508
KIF18B	Kinesin-motor	Q	156	25	5.706	0.008844	-0.8763	0.05576
KIF22	Kinesin-motor	P	41	24	6.571	0.005333	-0.4985	0.2878
KIF22	Kinesin-motor	I	76	26	1.053	0.005229	-0.06927	0.3561
KIRREL2	Ig-like C2-type 2	L	176	22	4.447	0.008169	-0.4657	0.1994
KIRREL2	Ig-like C2-type 2	T	181	22	2.009	0.008789	-0.02256	0.8894
KIRREL2	Ig-like C2-type 5	R	458	20	6.679	0.004394	-0.345	0.4617
KIRREL2	Ig-like C2-type 5	S	480	21	4.154	0.004376	-0.4465	0.1429
KIT	Ig-like C2-type 2	K	158	26	2.304	0.009548	-0.1208	0.5332
KIT	Ig-like C2-type 2	D	165	26	2.074	0.005942	-0.06809	0.6751
KLK6	Peptidase S1	S	82	19	6.674	0.0004361	-1.368	0.002559
KLK6	Peptidase S1	T	146	19	5.019	0.0008917	-1.148	0.002049
LAMA2	Laminin IV type A 2	E	1263	27	1.971	0.006765	-0.02324	0.88
LAMA2	Laminin IV type A 2	Q	1364	24	7	0.008161	-1.256	0.02377
LAMA3	Laminin EGF-like 5	S	527	24	5.005	0.004128	-0.5884	0.1153
LAMA3	Laminin EGF-like 5	H	556	21	5.127	0.003415	-0.1325	0.7121
LETMD1	LETM1	N	260	28	3.769	0.0007696	-0.4401	0.05275
LETMD1	LETM1	Q	344	29	1.756	0.00433	-0.07104	0.5647
LGTN	SUI1	R	498	27	2.327	0.008009	-0.4241	0.02678
LGTN	SUI1	I	523	26	4.559	0.001848	-0.9627	0.004908
LIFR	Fibronectin type-III 2	S	392	25	3.095	0.003913	-0.4296	0.0475
LIFR	Fibronectin type-III 2	N	402	25	5.4	0.002244	-0.594	0.08815
LRIT2	Fibronectin type-III	N	363	18	6.3	0.008342	-1.265	0.03511
LRIT2	Fibronectin type-III	E	407	22	3.389	0.002396	-0.755	0.005023
LTF	Transferrin-like 2	D	584	25	4.141	0.006462	-1.013	0.003059
LTF	Transferrin-like 2	K	675	24	2.009	0.005481	-0.2074	0.1599
MAPK13	Protein kinase	A	175	21	3.304	0.004304	-0.6174	0.01256
MCF2	DH	V	586	25	2.061	0.001931	-0.314	0.02221
MCF2	DH	S	640	25	5.42	0.001555	-1.186	0.003157
MFI2	Transferrin-like 2	S	612	24	5.942	0.002	-0.4618	0.2365
MFI2	Transferrin-like 2	A	699	25	5.492	0.003808	-0.7332	0.05611
MTTP	Vitellogenin	P	107	27	8.76	0.002207	-1.025	0.07094
MTTP	Vitellogenin	H	181	29	5.756	0.005411	-0.2483	0.5452
MYO18A	Myosin head-like	Y	536	30	6.881	0.0002811	-0.7672	0.03899
MYO18A	Myosin head-like	D	1078	26	3.481	0.004603	-0.7105	0.01014
MYO5C	Myosin head-like	E	55	28	6.493	0.001727	-0.2267	0.5766
MYO5C	Myosin head-like	S	56	28	3.293	0.005565	-0.5798	0.02086
MYO7B	MyTH4 1	A	1025	19	3.503	0.003812	-0.7479	0.007179
MYO7B	MyTH4 1	P	1072	20	11.83	0.004444	-2.669	0.005118
MYO7B	FERM 2	G	2067	18	14.36	0.006892	-2.948	0.02259
MYO7B	FERM 2	Q	2328	20	8.155	0.003441	-0.7988	0.2105
NIN	EF-hand 4	E	222	28	3.156	0.002592	-0.07325	0.7321
NIN	EF-hand 4	H	229	24	4.972	0.005135	-0.1421	0.6978
NLRP12	NACHT	K	376	18	1.839	0.009207	-0.4554	0.009691
NLRP12	NACHT	N	394	19	6.448	0.003662	-1.227	0.01746
NTN5	NTR	N	347	25	4.338	0.004002	-0.04914	0.8718
NTN5	NTR	R	355	24	4.707	0.006665	-0.1476	0.6771
OBSCN	Ig-like 43	R	1818	21	6.131	0.008024	-0.4491	0.3534
OBSCN	Ig-like 43	T	1850	21	6.216	0.007996	-1.356	0.0109
ORC1L	BAH	Y	117	24	6.609	0.009232	-1.41	0.01228
ORC1L	BAH	A	119	24	3.653	0.002091	-0.5205	0.03614
PBK	Protein kinase	N	45	24	3.389	0.002269	-0.1787	0.4425
PBK	Protein kinase	K	259	27	2.94	0.007551	-0.1772	0.4212
PDCD11	S1 motif 9	M	1038	28	4.905	0.0059	-0.4507	0.259
PDCD11	S1 motif 9	I	1046	28	1.235	0.004378	-0.1247	0.1987
PDCD1LG2	Ig-like V-type	V	25	25	2.099	0.001158	-0.06702	0.6003
PDCD1LG2	Ig-like V-type	T	39	25	2.557	0.002528	-0.07263	0.6701
PGBD1	SCAN box	R	46	19	12.11	0.002517	-2.166	0.01817
PGBD1	SCAN box	T	124	20	10.18	0.0004672	-2.526	0.0006232
PKD1L1	REJ	Q	1135	14	11.28	0.008289	-3.511	0.004
PKD1L1	REJ	I	1149	14	9.223	0.00484	-1.657	0.04283
PLA2G4A	PLA2c	E	443	29	8.838	0.0001412	-1.311	0.007339
PLA2G4A	PLA2c	T	512	29	3.962	0.005788	-0.6582	0.03152
PRKDC	FAT	T	3267	26	3.891	0.004551	-0.544	0.04702
PRKDC	FAT	T	3483	27	4.148	0.004489	-0.5881	0.05986
PRLR	Fibronectin type-III 2	A	185	29	2.129	0.008168	-0.3944	0.02552
PRLR	Fibronectin type-III 2	S	195	28	2.504	0.00679	-0.4226	0.035
PTPRC	Tyrosine-protein phosphatase 1	F	711	27	6.973	0.0006131	-0.7161	0.08791
PTPRC	Tyrosine-protein phosphatase 1	N	741	26	4.201	0.005844	-0.492	0.1303
RASSF6	SARAH	Q	308	31	1.141	0.004002	-0.04128	0.6008
RASSF6	SARAH	T	312	30	4.749	0.003443	-0.649	0.05085
RECQL4	Helicase C-terminal	N	708	27	6.425	0.002264	-1.127	0.01073
RECQL4	Helicase C-terminal	V	767	27	2.455	0.004014	-0.2076	0.226
RIPK1	Protein kinase	E	107	29	3.014	0.002839	-0.3792	0.05428
RIPK1	Protein kinase	D	180	30	4.036	0.00611	-0.7695	0.01358
ROS1	Fibronectin type-III 3	H	571	25	5.324	0.009021	-0.4458	0.3331
ROS1	Fibronectin type-III 3	G	631	26	6.779	0.003521	-0.9659	0.05023
ROS1	Fibronectin type-III 7	T	1566	25	3.169	0.0005973	-0.2731	0.1293
ROS1	Fibronectin type-III 7	G	1616	23	4.485	0.002693	-0.2439	0.4054
RPGRIP1	C2	A	824	26	3.828	0.006084	-0.5787	0.06096
RPGRIP1	C2	N	843	25	4.229	0.001044	-0.4832	0.0743
RPS6KA6	Protein kinase 2	R	518	26	3.621	0.0039	-0.2595	0.2823
RPS6KA6	Protein kinase 2	M	595	25	3.513	0.0008328	-0.1382	0.4704
SHBG	Laminin G-like 1	P	159	18	7.065	0.009277	-1.31	0.03229
SHBG	Laminin G-like 1	P	166	18	9.163	0.004652	-1.051	0.125
SHROOM1	ASD2	G	591	25	7.4	0.004126	-1.108	0.03707
SHROOM1	ASD2	P	635	25	6.334	0.008903	-0.4225	0.388
SNX25	PXA	K	3	15	8.685	0.006083	-2.353	0.00288
SNX25	PXA	K	6	15	8.884	0.006712	-2.362	0.003634
SNX25	RGS	A	293	25	2.73	0.003013	-0.08974	0.613
SNX25	RGS	H	300	25	6.209	0.000419	-0.6578	0.05164
SPINK5	Kazal-like 6	V	374	19	7.148	0.004815	-1.588	0.003417
SPINK5	Kazal-like 6	R	375	19	4.558	0.0005299	-0.7499	0.004004
STK31	Protein kinase	W	605	21	9.907	0.003328	-0.21	0.7595
STK31	Protein kinase	T	811	19	3.482	0.005251	-0.1737	0.4957
SVEP1	Pentaxin	K	1460	25	0.763	0.003703	-0.0212	0.6968
SVEP1	Pentaxin	K	1466	24	2.638	0.006715	-0.5948	0.00633
SVEP1	Sushi 16	P	2262	30	5.467	0.001657	-0.2127	0.5279
SVEP1	Sushi 16	Q	2305	30	3.736	0.004664	-0.03411	0.8956
SYPL1	MARVEL	V	77	26	4.97	0.002478	-0.8768	0.01361
SYPL1	MARVEL	D	81	26	8.096	0.003517	-1.806	0.003673
TECTA	VWFD 2	F	735	26	2.882	0.002659	-0.04334	0.8256
TECTA	VWFD 2	E	794	24	1.933	0.004886	-0.02946	0.8325
TFPI2	BPTI/Kunitz inhibitor 2	S	101	21	4.401	0.003926	-0.5515	0.09225
TFPI2	BPTI/Kunitz inhibitor 2	R	132	22	6.594	0.009778	-1.232	0.02351
TGFBRAP1	CNH	K	67	25	1.163	0.00937	-0.1993	0.03057
TGFBRAP1	CNH	I	148	26	0.6543	0.002617	-0.03887	0.3604
TRIM25	B30.2/SPRY	A	446	23	4.423	0.006797	-0.6554	0.04949
TRIM25	B30.2/SPRY	P	450	21	7.375	0.008828	-0.4106	0.4468
TYK2	FERM	D	295	20	4.162	0.002114	-0.3286	0.1992
TYK2	FERM	A	375	22	4.979	0.00574	-0.4324	0.2435
USH2A	Fibronectin type-III 6	T	1959	23	2.952	0.007933	-0.8086	0.003841
USH2A	Fibronectin type-III 6	R	1962	23	7.726	0.00645	-1.458	0.03085
USH2A	Fibronectin type-III 7	K	2079	26	3.223	0.002276	-0.4326	0.05021
USH2A	Fibronectin type-III 7	Y	2137	23	5.711	0.001515	-0.9633	0.009556
USP48	DUSP 2	D	616	28	3.367	0.009115	-0.247	0.3497
USP48	DUSP 2	K	669	25	1.784	0.003375	-0.1234	0.3014
ZNF541	ELM2	H	1098	21	5.226	0.004276	-0.426	0.2712
ZNF541	ELM2	T	1121	22	3.141	0.00505	-0.2939	0.2179
